# Supplementary material
Source: publisher site journal article supplement (https://www.dovepress.com/article/379326)
Supplement: Supplementary file 1 [file get_supplementary_file.php]

**Supplementary Content**

**Supplementary Table 1.** **Liver Function Evaluated by ALBI Level After Surgery and HAIC-Surgery**

|  | **Surgery**  **(n=213)** | **HAIC-Surgery**  **(n=107)** | ***p* value** |
| --- | --- | --- | --- |
| **Deterioration** | 118(55.4%) | 75(70.1%) | 0.011 |
| **No Deterioration** | 95(44.6%) | 32(29.9%) |  |

**Supplementary Table 2. Correlation Analysis of ALBI Score Changes before and after Surgery with HAIC Cycles of Treatment**

| **Cycles of HAIC** | **ALBI Difference before and after Surgery** | | | | | |
| --- | --- | --- | --- | --- | --- | --- |
| -1  (n=1) | 0  (n=29) | 1  (n=75) | 2  (n=2) | **Sperman** | ***p* value** |
| 1 | 0 | 2 | 7 | 0 |  |  |
| 2 | 1 | 10 | 33 | 0 |  |  |
| 3 | 0 | 4 | 10 | 0 | 0.229 | 0.042 |
| 4 | 0 | 11 | 18 | 2 |  |  |
| 5- | 0 | 2 | 7 | 0 |  |  |

**Supplementary Table 3. Analysis of Pathological Complete Remission and HAIC Cycles**

| **Cycles of HAIC** | **Total cases** | **pCR cases** | ***p* value** |
| --- | --- | --- | --- |
| 1-2 | 53 | 7(13.2%) | 0.043 |
| 3-5 | 51 | 15(29.4%) |  |
